# Supplementary material for: Egg white-derived peptides reduced blood glucose in high-fat-diet and low-dose streptozotocin-induced type 2 diabetic mice via regulating the hepatic gluconeogenic signaling and metabolic profile
Source: Royal Society of Chemistry journal article supplement (doi:10.1039/d4fo00725e), 2024-01-01
Supplement: d4fo00725e1.pdf [file d4fo00725e1.pdf]

## Supplementary Table and Figures

### Supplementary Table 1

Table 1 The sensitivities and limits of detection for the kits

| Index        | Sensitivity |
|--------------|-------------|
| INS          | 1.5mu/L     |
| GLP-1        | 0.25pmol/L  |
| GHb          | 3.2ng/ml    |
| GC           | 3.75mU/L    |
| TG           | 0.3mmol/L   |
| TC           | 0.1mmol/L   |
| NEFA         | 0.102ng/mL  |
| IL6          | 3.2pg/mL    |
| IL1b         | 6.4pg/mL    |
| TNF $\alpha$ | 6.1pg/mL    |

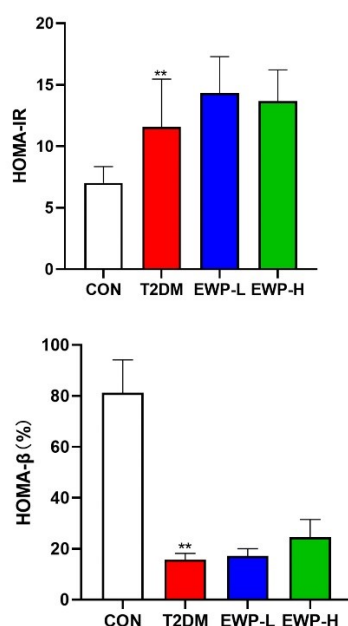

**Supplementary Figure 1 EWP treatment modulated the levels of HOMA-IR and HOMA- $\beta$  in the liver tissue of T2DM mice.** The liver tissues were collected at the end of the animal protocol. A: The concentration of HOMA-IR in liver tissue. B: The concentration of HOMA- $\beta$  in liver tissue. Results are presented as mean  $\pm$  SD from 6-8 animals of each group. \* $P < 0.05$ , \*\* $P < 0.01$ , T2DM group compared with CON group; # $P < 0.05$ , ## $P < 0.01$ , T2DM, group compared with the EWP-H group. (CON: n=6; T2DM: n=6; EWP-L: n=8; EWP-H: n=8)

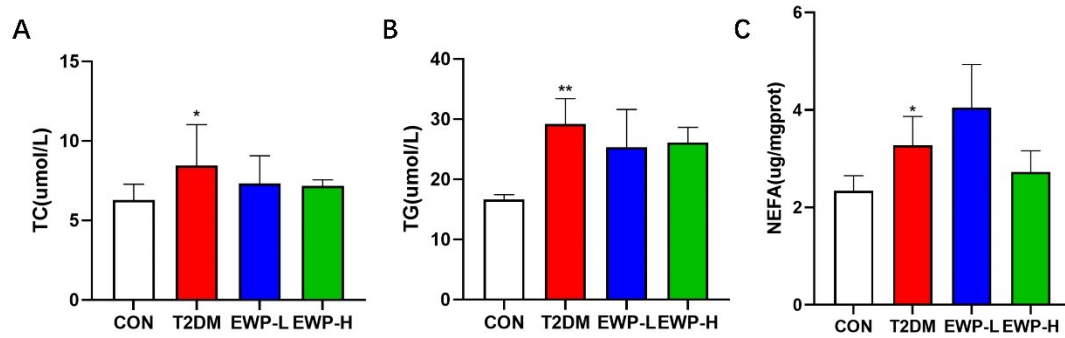

**Supplementary Figure 2 EWP treatment modulated the levels of TC, TG and NEFA in the liver tissue of T2DM mice.** The liver tissues were collected at the end of the animal protocol. A: The concentration of TC in liver tissue. B: The concentration of TG in liver tissue. C: The concentration of NEFA in liver tissue.. Results are presented as mean  $\pm$  SD from 6-8 animals of each group. \*P < 0.05, \*\* P < 0.01, T2DM group compared with CON group; # P < 0.05, ## P < 0.01, T2DM, group compared with the EWP-H group. (CON: n=6; T2DM: n=6; EWP-L: n=8; EWP-H: n=8)

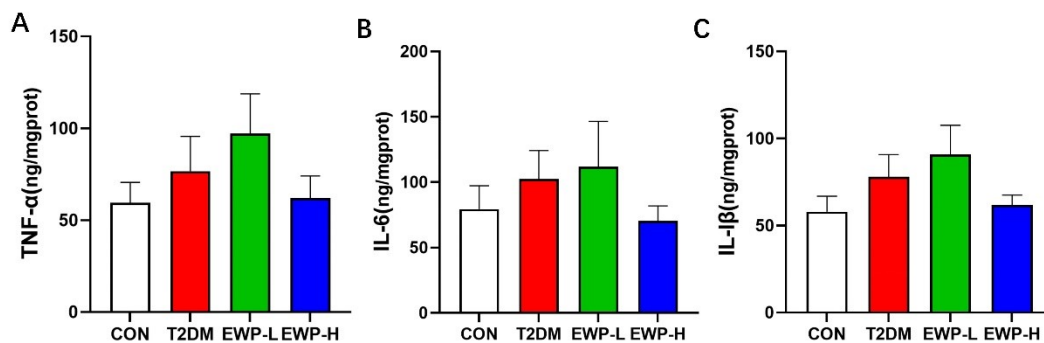

**Supplementary Figure 3 EWP treatment modulated the levels of TNF- $\alpha$ , IL-6 and IL-1 $\beta$  in the liver tissue of T2DM mice.** The liver tissues were collected at the end of the animal protocol. A: The concentration of TNF- $\alpha$  in liver tissue. B: The concentration of IL-6 in liver tissue. C: The concentration of IL-1 $\beta$  in liver tissue.. Results are presented as mean  $\pm$  SD from 6-8 animals of each group. \*P < 0.05, \*\* P < 0.01, T2DM group compared with CON group; # P < 0.05, ## P < 0.01, T2DM, group compared with the EWP-H group. (CON: n=6; T2DM: n=6; EWP-L: n=8; EWP-H: n=8)

Supplementary Figure 4-5 Raw Western blot images.

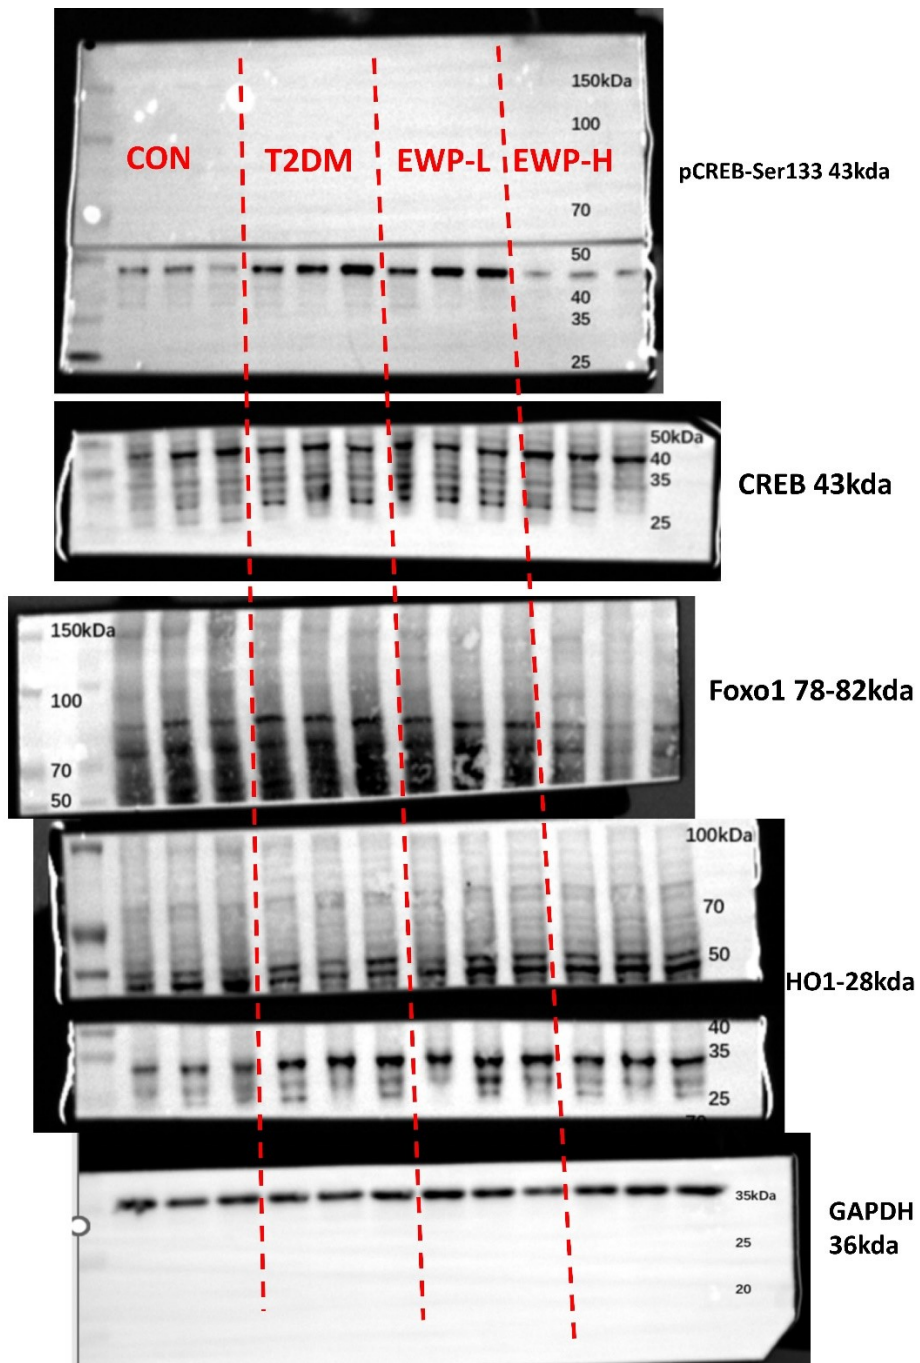

Figure 4

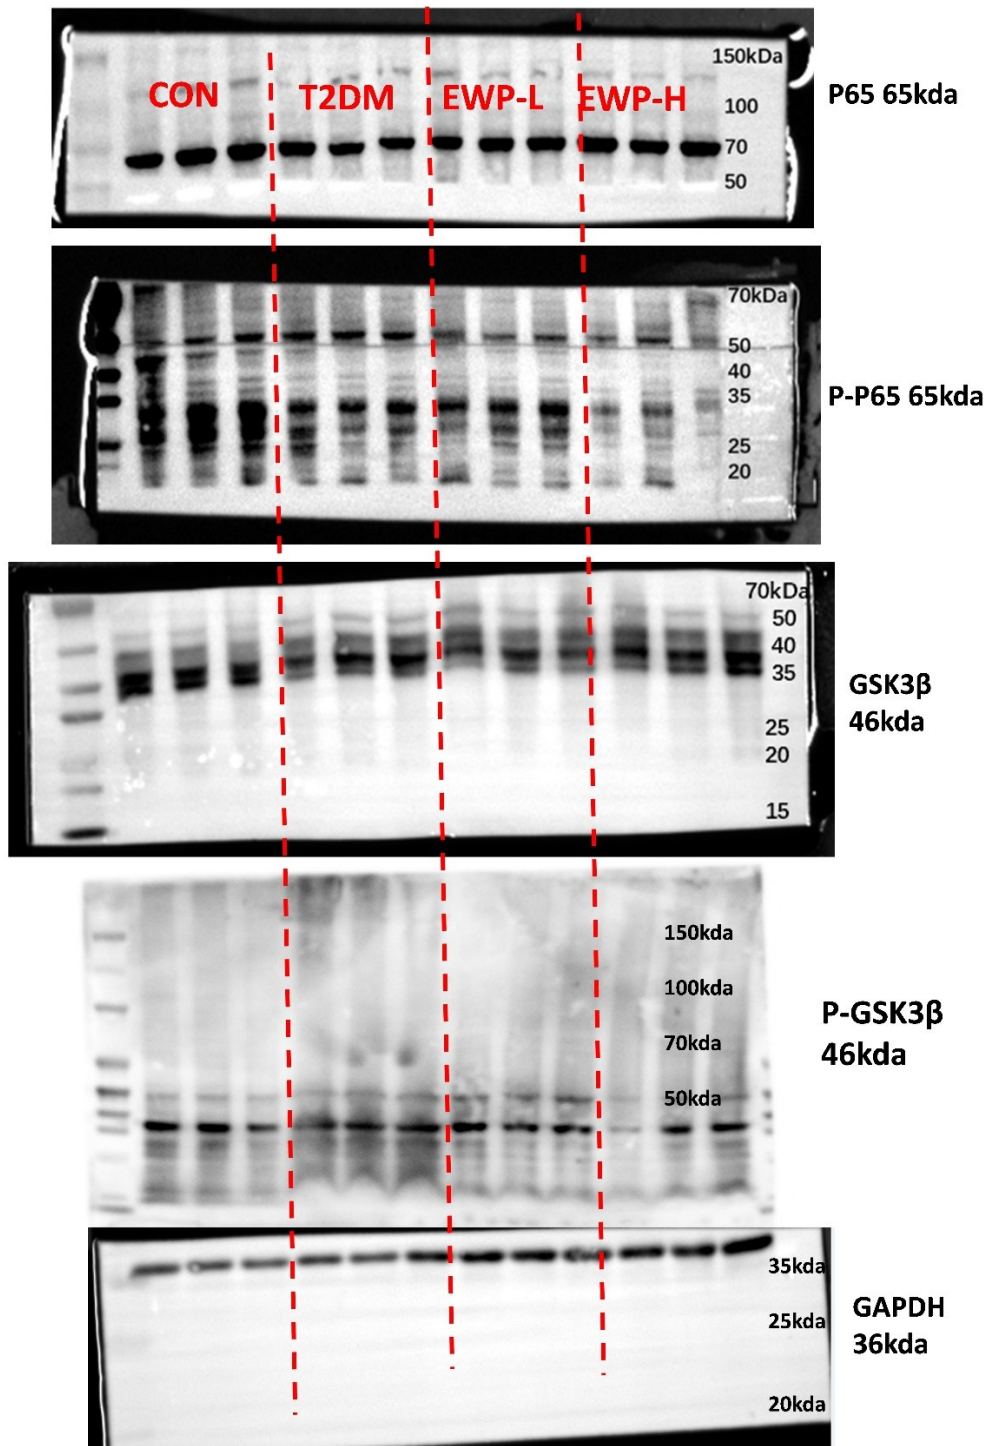

Figure 5
